# Supplementary material for: The successful implementation of the Enhanced Recovery After Surgery (ERAS) program among caesarean deliveries in Bhutan to reduce the postoperative length of hospital stay
Source: BMC Pregnancy Childbirth. 2021 Sep 18;21:637. doi: 10.1186/s12884-021-04105-9 (PMC8449869; doi:10.1186/s12884-021-04105-9)
Supplement: Supplementary file 1 — Additional file 1. [file 12884_2021_4105_MOESM1_ESM.xlsx]

## Sheet: A_ERASFINAL
studyno	ERAS done or not	pt age	parity	bmi	Pre-hb	Post-hb	comorbid conditions	dt of adm	dt of CD	dt of discharge	type of CD	indications	Blood transfusion	length of stay(hrs)	complications
10	1	35	1	9	12	10.6	0	2020-01-02	2020-01-03	2020-01-06	2	1	2	73	1
41	1	34	1	9	16.1	14.1	2	2020-01-06	2020-01-07	2020-01-10	2	2	2	72	1
58	1	32	2	9	10.8	8.8	0	2020-01-07	2020-01-07	2020-01-10	1	1	2	79	1
59	1	32	5	9	12.4	11.1	0	2020-01-07	2020-01-09	2020-01-12	2	1	2	71	1
73	1	32	0	9	11.3	7.7	0	2020-01-08	2020-01-08	2020-01-11	1	2	2	69	1
129	1	27	2	9	14.3	9.3	0	2020-01-13	2020-01-13	2020-01-16	1	2	2	69	1
142	1	30	1	9	14.5	10.8	0	2020-01-14	2020-01-16	2020-01-19	2	1	2	70	5
148	1	43	3	9	11.4	8.8	0	2020-01-14	2020-01-14	2020-01-17	1	2	2	64	1
161	1	23	1	9	13.6		0	2020-01-15	2020-01-16	2020-01-19	2	1	2	72	3
162	1	24	0	9	12.2	8.6	0	2020-01-15	2020-01-18	2020-01-21	1	2	2	66	1
219	1	36	3	9	12.3	10.2	0	2020-01-20	2020-01-21	2020-01-24	2	1	2	71	1
228	1	29	1	9	13.2	10.7	0	2020-01-21	2020-01-23	2020-01-26	2	2	2	73	1
229	1	29	0	9	13.5		0	2020-01-21	2020-01-22	2020-01-25	1	2	2	78	1
262	1	25	1	9	14.2	11.1	0	2020-01-23	2020-01-27	2020-01-30	2	1	2	71	1
272	1	27	2	9	13.3	12	0	2020-01-24	2020-01-27	2020-01-30	2	1	2	71	1
278	1	21	1	9	11.4	9.8	0	2020-01-25	2020-01-27	2020-01-30	2	1	2	70	1
294	1	33	2	9	13.7	10.8	0	2020-01-26	2020-01-27	2020-01-30	2	2	2	71	1
308	1	38	2	9	12.8	9.6	0	2020-01-27	2020-01-28	2020-01-31	1	4	2	64	1
326	1	36	2	9		12.4	0	2020-01-29	2020-01-29	2020-02-02	1	4	2	91	1
332	1	23	0	9	12.6	9	1	2020-01-30	2020-01-30	2020-02-02	1	3	2	78	1
342	1	25	1	9	13.1	9.6	0	2020-01-30	2020-01-30	2020-02-02	2	1	2	70	1
357	1	26	1	9	13.8	10	0	2020-01-31	2020-02-06	2020-02-09	2	1	2	72	1
376	1	19	1	9	12.3	10.3	0	2020-02-02	2020-02-03	2020-02-06	2	1	2	72	1
384	1	26	0	9	12.4		0	2020-02-03	2020-02-03	2020-02-06	1	2	2	70	1
410	1	42	5	9	11.5		1	2020-02-05	2020-02-13	2020-02-16	2	2	2	71	1
428	1	24	0	9	14.4	10.9	0	2020-02-06	2020-02-10	2020-02-13	2	2	2	69	1
450	1	24	0	9	12.2		0	2020-05-25	2020-05-29	2020-06-01	2	5	2	71	1
458	1	26	0	9	13	10.5	0	2020-02-09	2020-02-10	2020-02-13	2	2	2	72	1
506	1	42	2	9	12.9	12.4	1	2020-02-12	2020-02-13	2020-02-17	2	2	2	96	1
509	1	25	1	9	12.6		0	2020-02-12	2020-02-13	2020-02-16	2	1	2	70	1
517	1	35	2	9	13.4	12.5	1	2020-02-13	2020-02-14	2020-02-17	1	3	2	82	1
520	1	28	0	9	13.8	11.6	0	2020-02-13	2020-02-16	2020-02-19	1	2	2	69	1
533	1	29	0	9	12.4		0	2020-02-15	2020-02-19	2020-02-22	1	4	2	70	1
556	1	38	1	9	13.1		0	2020-02-17	2020-02-19	2020-02-22	2	1	2	72	1
620	1	31	1	9	11.7		0	2020-02-23	2020-02-23	2020-03-01	1	2	2	175	5
630	1	38	4	9	12.5	12.1	0	2020-02-25	2020-02-28	2020-03-02	2	5	2	73	1
644	1	19	1	9	13.4	9.6	0	2020-02-26	2020-02-26	2020-02-29	1	1	2	62	1
646	1	27	2	9	14		0	2020-02-26	2020-02-27	2020-02-29	2	1	2	48	1
688	1	24	1	9	12.1	10.2	0	2020-03-01	2020-03-02	2020-03-05	2	1	2	73	1
735	1	39	1	9	11	9.8	0	2020-03-04	2020-03-05	2020-03-08	2	1	2	72	1
773	1	29	2	9	13.1	11.2	0	2020-03-07	2020-03-09	2020-03-12	2	3	2	72	1
841	1	25	1	9	11.6	10.1	0	2020-03-13	2020-03-13	2020-03-16	1	1	2	71	1
855	1	28	1	9	12.2	11.2	0	2020-03-15	2020-03-16	2020-03-19	2	2	2	71	1
880	1	19	0	9	12.4	11	0	2020-03-17	2020-03-21	2020-03-24	1	5	2	71	1
937	1	22	0	9	11	7.9	0	2020-03-22	2020-03-26	2020-03-29	2	5	2	72	1
976	1	32	0	9	13.8	11.9	0	2020-03-27	2020-03-27	2020-03-30	1	3	2	61	1
990	1	29	0	9	12.2	10.5	0	2020-03-28	2020-03-29	2020-04-01	1	4	2	61	1
995	1	17	1	9	12.4	10.2	0	2020-03-28	2020-03-28	2020-03-31	1	1	2	65	1
999	1	31	1	9	13	11	0	2020-03-29	2020-03-30	2020-04-02	2	1	2	71	1
1000	1	27	2	9	10.8	7.5	6	2020-03-29	2020-03-29	2020-04-01	1	2	2	61	1
1040	1	23	0	9	11.8		1	2020-04-01	2020-04-01	2020-04-06	1	3	2	111	1
1082	1	31	1	9	11.2		0	2020-04-05	2020-04-05	2020-04-09	1	2	2	84	1
1126	1	35	1	9	13.8	10.2	0	2020-04-09	2020-04-09	2020-04-12	1	1	2	74	1
1163	1	29	1	9	11.5	10.6	0	2020-04-13	2020-04-13	2020-04-16	2	1	2	71	1
1178	1	32	2	9	11.5		1	2020-04-14	2020-04-17	2020-04-21	1	2	2	87	1
1211	1	22	0	9	11	9.8	0	2020-04-16	2020-04-20	2020-04-23	1	5	2	71	1
1243	1	34	3	9	10.6	9.3	0	2020-04-21	2020-04-27	2020-04-30	2	2	2	71	1
1265	1	31	1	9	13.5		0	2020-04-22	2020-04-23	2020-04-26	2	1	2	71	1
1288	1	33	4	9	13	11	0	2020-04-24	2020-04-26	2020-04-29	1	2	2	62	3
1316	1	32	1	9	12.9	11.8	0	2020-04-27	2020-04-27	2020-04-30	2	1	2	70	1
1353	1	29	0	9	12.3	11.4	0	2020-04-29	2020-04-30	2020-05-03	2	2	2	71	1
1368	1	41	2	9	11.7	9.2	0	2020-05-01	2020-05-05	2020-05-08	1	5	2	71	1
1369	1	23	2	9	12.6	9.3	0	2020-05-01	2020-05-07	2020-05-10	2	2	2	71	1
1370	1	23	0	9	12.2	11	0	2020-05-01	2020-05-06	2020-05-09	1	5	2	72	1
1377	1	33	1	9	13	11.9	0	2020-05-03	2020-05-04	2020-05-07	2	1	2	70	1
1378	1	30	1	9	13.8	11.8	0	2020-05-03	2020-05-04	2020-05-07	2	1	2	71	1
1418	1	22	1	9	10.9	10	1	2020-05-07	2020-05-08	2020-05-11	1	1	2	74	1
1449	1	30	2	9	11.9	10.6	0	2020-05-10	2020-05-11	2020-05-14	2	1	2	72	1
1486	1	24	1	9	14	12.4	0	2020-05-13	2020-05-13	2020-05-15	1	2	2	54	1
1514	1	23	0	9	13.2	10.8	0	2020-05-16	2020-05-17	2020-05-20	1	4	2	67	1
1551	1	33	1	9	12.6	12	0	2020-05-20	2020-05-21	2020-05-24	2	1	2	72	1
1581	2	31	1	3	12	10	0	2020-08-19	2020-08-20	2020-08-22	4	2	2	48	1
1595	1	44	3	9	12.4		0	2020-05-25	2020-05-29	2020-06-01	2	5	2	70	1
1597	1	25	0	9	14		0	2020-05-25	2020-05-27	2020-05-30	1	4	2	64	1
1634	1	31	1	9	9.2	8.7	6	2020-05-27	2020-05-28	2020-05-31	2	1	1	72	9
1639	1	21	0	9	13.4	11.9	0	2020-05-28	2020-05-28	2020-05-31	1	2	2	72	1
1700	1	24	1	9	13.2	11.8	0	2020-06-03	2020-06-04	2020-06-07	2	1	2	73	1
1730	1	43	3	9	13.7	11.9	1	2020-06-06	2020-06-11	2020-06-14	1	5	2	68	3
1907	2	34	1	3	13.1	10.2	0	2020-08-01	2020-08-01	2020-08-03	3	1	2	47	1
1908	1	26	3	9	12	10.8	0	2020-06-23	2020-06-25	2020-06-28	2	1	2	71	1
1956	1	25	0	9	13.8	9.6	0	2020-06-28	2020-06-29	2020-07-02	1	2	2	69	1
1984	2	32	1	3	12.3	10.9	1	2020-07-01	2020-07-02	2020-07-04	4	1	2	46	1
1996	2	28	2	3	12.4	11.2	0	2020-07-02	2020-07-02	2020-07-04	4	1	2	48	1
2000	2	27	3	3	12	10.7	2	2020-07-03	2020-07-05	2020-07-07	3	2	2	43	1
2011	2	39	4	3	12.1	11	1	2020-07-28	2020-07-30	2020-08-02	3	3	2	73	5
2107	1	30	3	2			2	2020-04-01	2020-04-06	2020-04-09	2	3	2	72	1
2112	2	29	0	2			0	2020-12-03	2020-12-03	2020-12-05	4	2	2	48	1
2113	1	26	0	2			0	2020-01-03	2020-01-07	2020-01-10	2	2	2	72	1
2116	1	38	1	2			0	2020-06-08	2020-06-08	2020-06-11	1	1	2	74	1
2119	1	32	3	2			1	2020-05-13	2020-05-13	2020-05-16	1	3	2	74	1
2122	2	37	2	2	11.6	8.4	0	2020-07-15	2020-07-15	2020-07-17	3	3	2	70	1
2127	1	27	1	2			0	2020-05-18	2020-05-18	2020-05-21	2	1	2	72	1
2128	2	27	1	3	12.4	10.8	0	2020-07-16	2020-07-16	2020-07-18	4	1	2	48	1
2137	1	30	2	2			0	2020-04-20	2020-04-23	2020-04-26	1	2	2	73	1
2140	1	35	2	2			0	2020-02-15	2020-02-17	2020-02-20	2	1	2	73	1
2182	2	26	0	2	11.5	10	0	2020-07-20	2020-07-20	2020-07-22	4	2	2	48	1
2198	2	32	1	3	11.3	10.1	0	2020-07-22	2020-07-23	2020-07-25	4	1	2	47	1
2212	2	24	0	4	13.4	11.9	8	2020-09-03	2020-09-03	2020-09-05	3	4	2	42	1
2244	2	42	2	2	12.3	11	0	2020-07-26	2020-07-27	2020-07-29	4	1	2	48	5
2268	2	37	4	3	13.6	12.1	0	2020-07-28	2020-07-29	2020-07-31	3	3	2	46	1
2286	2	40	2	4	9.8	8.7	6	2020-07-30	2020-07-30	2020-08-01	4	1	2	46	9
2310	2	43	0	3	12.4	11.7	0	2020-08-09	2020-08-09	2020-08-12	3	2	2	71	4
2348	2	35	0	3	12.3	9.3	0	2020-08-04	2020-08-10	2020-08-12	4	5	2	46	1
2352	2	31	1	3	12	11	0	2020-08-05	2020-08-06	2020-08-08	4	1	2	48	1
2375	2	26	0	4	12.5	10.6	8	2020-08-06	2020-08-10	2020-08-12	4	5	2	47	1
2434	2	20	1	3	12.8	12.4	8	2020-08-13	2020-08-17	2020-08-19	4	1	2	47	1
2435	2	38	2	3	9.6	9.1	6	2020-08-13	2020-08-13	2020-08-15	3	1	2	42	1
2436	2	27	1	2	9.9	9	6	2020-08-13	2020-08-14	2020-08-16	4	1	2	48	1
2475	2	40	3	3	9.8	8.8	1	2020-09-04	2020-09-05	2020-09-08	3	2	2	72	1
2485	2	44	3	3	10.1	8.9	1	2020-08-18	2020-08-20	2020-08-22	3	2	2	46	1
2488	2	22	1	3	9.8	9.1	6	2020-08-19	2020-08-20	2020-08-22	4	1	1	48	1
2502	2	33	3	3	8.7	6.7	1	2020-08-20	2020-08-21	2020-08-25	3	2	1	95	5
2504	2	28	1	2	11.1	10.5	8	2020-12-11	2020-12-14	2020-12-17	4	2	2	72	1
2517	2	21	1	2	11.6	10.1	0	2020-08-24	2020-08-24	2020-08-27	3	2	2	59	1
2554	2	31	0	3	12.2	9.2	0	2020-08-27	2020-08-27	2020-08-29	3	4	2	41	1
2565	2	20	1	3	9.5	8.7	6	2020-08-29	2020-08-31	2020-09-02	4	1	2	47	1
2582	2	33	2	4	12.1	10.9	8	2020-08-31	2020-08-31	2020-09-02	3	4	2	36	1
2601	2	22	0	2	11	10.6	0	2020-09-02	2020-09-07	2020-09-11	4	2	2	95	9
2617	2	21	0	3	11.8	10.1	0	2020-09-04	2020-09-04	2020-09-06	3	2	2	41	1
2664	2	32	2	3	10.4	10.1	0	2020-09-09	2020-09-10	2020-09-12	4	1	2	48	1
2705	2	28	1	3	13	11.9	0	2020-09-13	2020-09-14	2020-09-16	4	1	2	48	1
2759	2	37	0	2	12.5	10.2	0	2020-09-17	2020-09-17	2020-09-18	4	2	2	24	1
2773	2	21	0	2	10.8	9.1	0	2020-09-19	2020-09-19	2020-09-21	3	2	2	37	1
2809	2	27	1	3	13.9	12.9	0	2020-09-22	2020-09-24	2020-09-26	4	2	2	47	1
2821	2	37	2	3	14	12	0	2020-09-24	2020-09-24	2020-09-26	4	1	2	47	1
2822	2	34	1	3	9.9	7.1	6	2020-09-24	2020-09-24	2020-09-26	4	1	1	53	5
2824	2	25	0	3	12.4	11.5	0	2020-09-24	2020-09-28	2020-09-30	4	5	2	48	5
2907	2	17	0	3	12	11.6	0	2020-10-02	2020-10-03	2020-10-05	3	2	2	51	1
2908	2	24	1	2	11	8	7	2020-10-02	2020-10-02	2020-10-07	3	1	2	116	3
3037	2	26	0	3	14.3	11.2	0	2020-10-15	2020-10-17	2020-10-19	3	4	2	40	7
3044	2	27	2	3	12	10.8	0	2020-10-16	2020-10-16	2020-10-18	3	2	2	38	1
3063	2	28	2	3	12.5	10.7	1	2020-10-19	2020-10-29	2020-11-02	4	1	2	96	1
3128	2	30	1	2	11.4	11	0	2020-10-24	2020-10-28	2020-10-30	4	1	2	48	1
3146	2	29	0	3	15.8	12.5	0	2020-10-27	2020-10-29	2020-10-31	3	4	2	39	1
3147	2	25	0	2	12.7	11.1	0	2020-10-27	2020-10-28	2020-10-30	3	2	2	53	1
3160	2	24	0	3	12.2	10.7	0	2020-10-28	2020-11-02	2020-11-04	4	3	2	47	2
3161	2	35	3	3	13	11.4	0	2020-10-28	2020-10-29	2020-10-31	3	4	2	55	1
3164	2	29	1	3	11.7	10.2	0	2020-10-29	2020-10-30	2020-11-01	4	1	2	48	1
3183	2	24	1	2	13	12.3	0	2020-10-31	2020-10-31	2020-11-02	3	1	2	34	1
3320	2	21	0	4	11.2	8.9	8	2020-11-13	2020-11-15	2020-11-17	3	4	2	41	1
3322	2	35	2	4	13.9	11.4	1	2020-11-20	2020-11-20	2020-11-22	3	2	2	39	9
3333	2	23	1	3	11.9	10.2	0	2020-11-14	2020-11-19	2020-11-23	4	1	2	96	5
3338	2	28	1	3	11.8	10.3	0	2020-11-15	2020-11-15	2020-11-17	3	1	2	43	1
3358	2	29	2	2	13	11.6	0	2020-11-16	2020-11-16	2020-11-18	4	1	2	47	1
3421	2	42	0	2	13.1	11	0	2020-11-23	2020-11-30	2020-12-02	4	3	2	48	1
3458	2	29	2	3	13.4	10.9	1	2020-11-26	2020-11-26	2020-11-29	3	1	2	63	5
3482	2	35	3	3	11.2	9.6	0	2020-11-28	2020-12-02	2020-12-04	3	5	2	44	1
3501	2	27	0	4	13.2	10.9	1	2020-11-30	2020-11-30	2020-12-02	4	2	2	47	5
3502	2	33	1	3	12.3	9.5	0	2020-11-30	2020-11-30	2020-12-02	4	1	2	46	1
3514	2	30	4	4	11.8	8.5	1	2020-12-01	2020-12-01	2020-12-04	3	3	2	60	1
3529	2	22	2	2	9.5	9.1	6	2020-12-02	2020-12-07	2020-12-09	4	1	2	47	1
3532	2	21	0	3	11.2	8.4	0	2020-12-02	2020-12-04	2020-12-06	3	4	2	54	3
3555	2	27	1	4	11.5	8.9	8	2020-12-04	2020-12-04	2020-12-06	3	4	2	37	1
3573	2	23	2	2	10.8	10.2	6	2020-12-06	2020-12-07	2020-12-09	4	1	2	46	1
3629	2	35	3	4	11.7	8.1	8	2020-12-10	2020-12-12	2020-12-14	3	5	2	49	1
3661	2	22	1	2	11.9	11.5	0	2020-12-13	2020-12-16	2020-12-18	4	1	2	48	1
3662	2	27	2	4	11.3	11	8	2020-12-13	2020-12-14	2020-12-16	4	1	2	46	5
3663	2	23	0	2	13.7	12	0	2020-12-13	2020-12-14	2020-12-16	4	2	2	46	1
3683	2	28	2	3	11.2	9.9	0	2020-12-15	2020-12-16	2020-12-17	3	1	2	35	1
3704	2	38	3	3	11.1	9.9	1	2020-12-18	2020-12-20	2020-12-22	3	2	2	46	1
3708	2	27	0	3	14	9.8	1	2020-12-19	2020-12-23	2020-12-26	4	3	2	71	1
3730	2	37	2	2	11.7	8.5	0	2020-12-21	2020-12-22	2020-12-24	3	3	2	55	1
3731	2	39	4	4	12.1	10.6	8	2020-12-21	2020-12-23	2020-12-26	4	5	2	72	1
3744	2	23	1	3	13.1	11.3	7	2020-12-22	2020-12-23	2020-12-25	4	3	2	47	1
3749	2	37	1	4	12.5	11.2	8	2020-12-23	2020-12-24	2020-12-26	4	1	2	46	1
3751	2	39	4	4	11.9	11.8	2	2020-12-23	2020-12-24	2020-12-26	4	1	2	47	1
3763	2	25	2	4	14.1	11.7	8	2020-12-25	2020-12-26	2020-12-28	3	2	2	46	1
3768	2	32	1	3	12.4	10.9	0	2020-12-26	2020-12-28	2020-12-30	4	1	2	49	1
3775	2	25	1	2	11	9.1	0	2020-12-27	2020-12-28	2020-12-30	4	1	2	47	1
3787	2	31	2	4	11.2	8.9	8	2020-12-29	2020-12-31	2020-12-31	4	1	1	72	9
4614	1	22	1	9	13.5	12.2	0	2020-01-01	2020-01-01	2020-01-04	2	1	2	71	1

## Sheet: Sheet1
ERAS done or not	Yes =2	No =1
Comorbid conditions	0 = None
	1= hypertension
	2=GDM
	3=lung dis
	4=heart dis
	5=renal dis
	6=anemia
	7=infection
	8=obesity
Type of CD	1=elective	2=emergency
indication of CD	1=past CS
	2=fetal reason
	3=maternal reason
	4=labour dystocia
	5=others
Complications	0=none
	1=nausea/vomiting
	2=SSI
	3=UTI
	4=Spinal headache
	5=endometritis
	6=readmission
	7=procedure complications
